# Supplementary material for: Organic chemistry students’ use of stability in mental models on acid and base strength
Source: Royal Society of Chemistry journal article supplement (doi:10.1039/d3rp00049d), 2023-01-01
Supplement: d3rp00049d1.pdf [file d3rp00049d1.pdf]

## **Organic Chemistry Students' Use of Stability in Mental Models on Acid and Base Strength**

### **Supporting Information**

|                                                  |       |
|--------------------------------------------------|-------|
| Interview Protocols .....                        | p. 2  |
| Correct Responses for Case Comparison Tasks..... | p. 5  |
| Codebook for Granularity .....                   | p. 7  |
| Granularity Analysis for Stability .....         | p. 9  |
| Granularity Analysis for Acidity.....            | p. 11 |
| Granularity Analysis for Basicity.....           | p. 13 |

## Interview Protocols

### Protocol A

#### Section 1:

*Prompt 1:* Structures of phenolate ( $C_6H_5O^-$ ) and cyclohexanolate ( $C_6H_{11}O^-$ ) ions are given below.

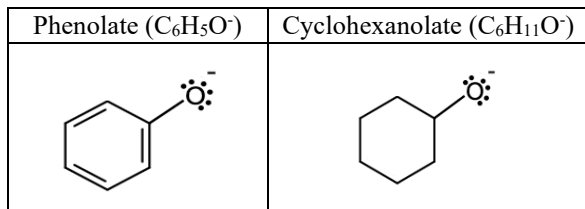

Considering the structures, compare the stability of phenolate ( $C_6H_5O^-$ ) and cyclohexanolate ( $C_6H_{11}O^-$ ) ions.

- 1.1. **Which ion** (phenolate ( $C_6H_5O^-$ ) and cyclohexanolate ( $C_6H_{11}O^-$ )) is more stable?
- 1.2. Using molecular structures, explain **why** you made such a stability order for phenolate ( $C_6H_5O^-$ ) and cyclohexanolate ( $C_6H_{11}O^-$ ).

*Prompt 2:* Structures of acetate ion ( $CH_3COO^-$ ) and structure of ethoxide ion ( $CH_3CH_2O^-$ ) are given below.

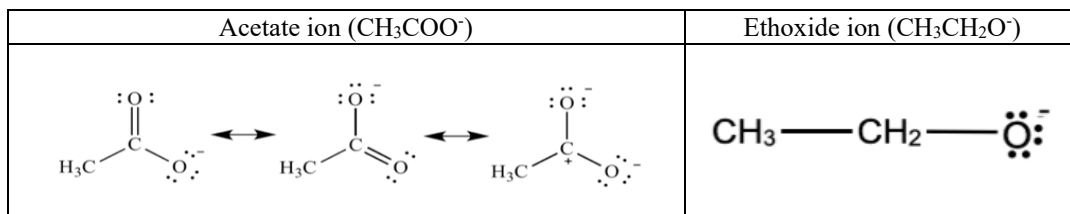

Considering the structures, compare the acidity of acetic acid ( $CH_3COOH$ ) and ethanol ( $CH_3CH_2OH$ ) in water.

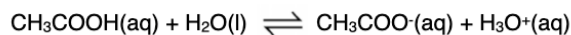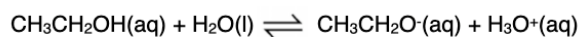

- 2.1 **Which one** (acetic acid ( $CH_3COOH$ ) and ethanol ( $CH_3CH_2OH$ )) is more acidic?
- 2.2. Using molecular structures, explain **why** you made such an acidity order for acetic acid ( $CH_3COOH$ ) and ethanol ( $CH_3CH_2OH$ )?

*Prompt 3:* Structure of acetamide ( $CH_3CONH_2$ ) and structure of ethylamine ( $CH_3CH_2NH_2$ ) molecules are given below.

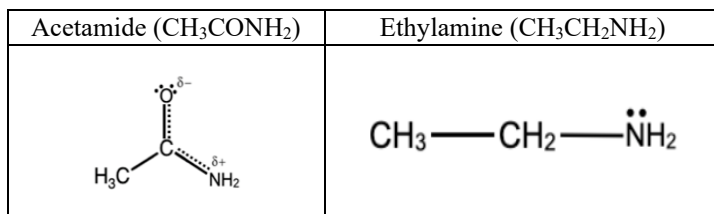

Considering the structures, compare the basicity of acetamide ( $\text{CH}_3\text{CONH}_2$ ) and ethylamine ( $\text{CH}_3\text{CH}_2\text{NH}_2$ ) in water.

- 3.1. **Which one** (acetamide ( $\text{CH}_3\text{CONH}_2$ ) and ethylamine ( $\text{CH}_3\text{CH}_2\text{NH}_2$ )) is more basic?
- 3.2. Using molecular structures, explain **why** you made such a basicity order for acetamide ( $\text{CH}_3\text{CONH}_2$ ) and ethylamine ( $\text{CH}_3\text{CH}_2\text{NH}_2$ )?

### Section 2:

*Prompt 1.* Structures of Ion A and Ion B are given below. Compare the stability of following ions.

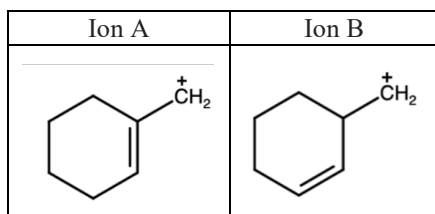

Considering the structures, compare the stability of ion A and ion B.

- 1.1 **Which ion** (Ion A and Ion B) is more stable?
- 1.2. Using molecular structures, explain **why** you made such a stability order for ion A and ion B.

*Prompt 2:* Structure of an acid is given below. Compare the acidity of hydrogen atoms.

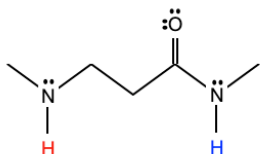

Considering the structure, compare the acidity of hydrogens?

- 2.1. **Which hydrogen** (red and blue) is more acidic?
- 2.2. Using molecular structure, explain **why** you made such an acidity order for hydrogens (red and blue).

*Prompt 3:* Structures of propene-1-olate and propoxide are given below. Compare the basicity of following ions.

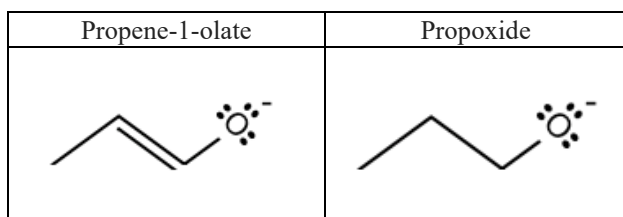

Considering the structures, compare the basicity of propene-1-olate and propoxide in water.

- 3.2. **Which one** (propene-1-olate and propoxide) is more basic?
- 3.2. Using molecular structures, explain **why** you made such a basicity order for propene-1-olate and propoxide.

### **Protocol B**

#### Section 1:

*Prompt 1:* Prompt is the same with the prompt 1 in section 1 in protocol A.

*Prompt 2:* Structure of acetate ion ( $\text{CH}_3\text{COO}^-$ ) and structure of ethoxide ion ( $\text{CH}_3\text{CH}_2\text{O}^-$ ) are given below.

| Acetate ion ( $\text{CH}_3\text{COO}^-$ ) | Ethoxide ion ( $\text{CH}_3\text{CH}_2\text{O}^-$ ) |
|-------------------------------------------|-----------------------------------------------------|
|                                           |                                                     |

Considering the structures, compare the acidity of acetic acid ( $\text{CH}_3\text{COOH}$ ) and ethanol ( $\text{CH}_3\text{CH}_2\text{OH}$ ) in water.

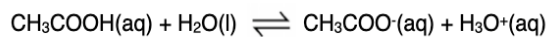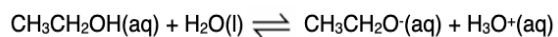

- 2.1. **Which one** (acetic acid ( $\text{CH}_3\text{COOH}$ ) and ethanol ( $\text{CH}_3\text{CH}_2\text{OH}$ )) is more acidic?
- 2.2. Using molecular structures, explain **why** you made such an acidity order for acetic acid ( $\text{CH}_3\text{COOH}$ ) and ethanol ( $\text{CH}_3\text{CH}_2\text{OH}$ )?

*Prompt 3:* Structures of acetamide ( $\text{CH}_3\text{CONH}_2$ ) and structure of ethylamine ( $\text{CH}_3\text{CH}_2\text{NH}_2$ ) molecules are given below.

| Acetamide ( $\text{CH}_3\text{CONH}_2$ ) | Ethylamine ( $\text{CH}_3\text{CH}_2\text{NH}_2$ ) |
|------------------------------------------|----------------------------------------------------|
|                                          |                                                    |

Considering the structures, compare the basicity of acetamide ( $\text{CH}_3\text{CONH}_2$ ) and ethylamine ( $\text{CH}_3\text{CH}_2\text{NH}_2$ ) in water.

- 3.1. **Which one** (acetamide ( $\text{CH}_3\text{CONH}_2$ ) and ethylamine ( $\text{CH}_3\text{CH}_2\text{NH}_2$ )) is more basic?
- 3.2. Using molecular structures, explain **why** you made such a basicity order for acetamide ( $\text{CH}_3\text{CONH}_2$ ) and ethylamine ( $\text{CH}_3\text{CH}_2\text{NH}_2$ )?

## Section 2:

Prompts in this section in protocol B is the same with the prompts in section 2 in protocol A.

## Correct Responses for the Case Comparison Tasks in Interviews

### Stability 1

Phenolate is more stable than cyclohexanolate. When comparing the stability of phenolate vs cyclohexanolate, the relevant factors are;

- Atom is the same therefore size and electronegativity not relevant
- Resonance/delocalization - spreading charge lowers free energy of phenolate
- Inductive effect - Through induction  $sp^2$  carbon groups are electron withdrawing through sigma bonds whereas  $sp^3$  carbon groups are electron donating through sigma bonds. Phenyl group is electron withdrawing which further stabilizes the phenolate ion (by spreading the charge of the anion across a larger area). Cyclo group is electron donating which destabilizes the cyclohexanolate ion (by concentrating negative charge on the oxygen).
- Orbital - The oxygen on phenolate is  $sp^2$  whereas the oxygen on cyclohexanolate is  $sp^3$ . The larger s-character on the oxygen on phenolate stabilizes the negative charge on that oxygen relative to the oxygen on the cyclohexanolate.

### Stability 2

Ion A is more stable than ion B. When comparing the stability of ion A and ion B, the relevant factors are;

- Atom is the same therefore size and electronegativity are not relevant
- Resonance/delocalization - spreading the charge lowers free energy of Ion A
- Inductive effect - Through induction  $sp^2$  carbon groups are electron withdrawing through sigma bonds whereas  $sp^3$  carbon groups are electron donating through sigma bonds. On the left structure the next-door  $sp^2$  carbon is electron withdrawing which destabilizes the carbocation through induction (by concentrating more positive charge at the carbocation). On the right structure the next-door  $sp^3$  carbon is electron donating which stabilizes that carbocation (by spreading the charge of the carbocation across a larger area). Therefore, induction decreases the stability of ion A. That is, this is opposite from the overall stability of these two ions because resonance has a larger effect than induction.
- Orbital is not relevant.

### Acidity 1

Acetic acid is more acidic than ethanol. When comparing the acidity of acetic acid ( $CH_3COOH$ ) and ethanol ( $CH_3CH_2OH$ ) in water, relevant factors are;

- Atom is the same therefore size and electronegativity not relevant.
- Resonance/delocalization - spreading charge lowers free energy and increases stability for conjugate base of acidic acid, which in turn increases the acidity of acetic acid.
- Inductive effect - electron withdrawing of carbonyl group ( $-C=O$ ) stabilize the acetate ion through polarization of sigma bonds of molecule. Therefore, induction increases stability for conjugate base of acidic acid, which in turn increases the acidity of acetic acid.
- Orbital - The oxygen on acetic acid is  $sp^2$  whereas the oxygen on ethanol is  $sp^3$ . The larger s-character on the oxygen on acetic acid stabilizes the negative charge on the oxygen of acetate relative to the oxygen of ethoxide. Therefore, induction increases stability for conjugate base of acidic acid, which in turn increases the acidity of acetic acid.

### Acidity 2

- Blue (amide) hydrogen is more acidic than red (amine) hydrogen. When comparing the acidity of blue (amide) and red (amine) and hydrogen, relevant factors are;
- Atom is the same therefore size and electronegativity are not relevant.
- Resonance/delocalization - spreading charge lowers free energy and increases stability for conjugate base of blue (amide) hydrogen, which in turn increases the acidity of blue hydrogen.

- Inductive effect - electron withdrawing of carbonyl group ( $\text{-C=O}$ ) stabilize the ion formed after donating blue (amide) hydrogen through polarization of sigma bonds of molecule. Therefore, induction increases stability for conjugate base of blue (amide) hydrogen, which in turn increases the acidity of blue (amide) hydrogen.
- Orbital - The nitrogen bonded to blue hydrogen (amide) is  $\text{sp}^2$  whereas the nitrogen bonded to red hydrogen (amine) is  $\text{sp}^3$ . The larger s-character of nitrogen bonded to blue hydrogen (amide) stabilizes the negative charge on the nitrogen of the conjugate base formed after donation of blue hydrogen (amide) relative to the negative charge on nitrogen of the conjugate base formed after donation of the red hydrogen (amine). Therefore, orbital increases stability of conjugate base formed after donation of blue (amide) hydrogen, which in turn increases the acidity of blue (amide) hydrogen.

### Basicity 1

Ethylamine is more basic than acetamide. When comparing the basicity of acetamide ( $\text{CH}_3\text{CONH}_2$ ) and ethyl amine ( $\text{CH}_3\text{CH}_2\text{NH}_2$ ) in water, relevant factors are;

- Atom is the same therefore size and electronegativity are not relevant.
- Resonance/delocalization - delocalization lowers free energy and hence increases stability of acetamide. Delocalizing the lone pair on nitrogen and giving the nitrogen atom a partial positive charge and makes it less available for bonding a proton for acetamide.
- Inductive effect - electron withdrawing of carbonyl group ( $\text{-C=O}$ ) stabilize the acetamide through polarization of sigma bonds of molecule. Therefore, induction increases stability for acetamide, which in turn decreases the basicity of acetamide.
- Orbital - The nitrogen on acetamide is  $\text{sp}^2$  whereas the nitrogen on ethylamine is  $\text{sp}^3$ . The lone pair on the amide is in a p-orbital, whereas the lone pair on the amine is  $\text{sp}^3$ . The larger s-character of the lone pair on nitrogen on ethylamine ( $\text{sp}^3$ ) is more stabilizing than on nitrogen on acetamide (p orbital). Therefore, orbital decreases the stability of acetamide, which in turn increases the basicity. That is, this is opposite of the overall effect since delocalization through resonance is a more important factor making the acetamide more stable and thus less basic.

### Basicity 2

Propene-1-olate is more basic (less stable) than propoxide. Propanal  $\text{pK}_a \sim 17$  and propanol  $\text{pK}_a \sim 16$ . When comparing the basicity of propene-1-olate and propoxide in water, relevant factors are;

- Atom - Most important factor in determining basicity. On the propene-1-olate, the negative charge is on both the oxygen and the carbon. The resonance structure drawn contributes more to the overall structure but the other structure does place a decent amount of partial negative charge on the carbon. Negative charge on a less electronegative atom (C) is less stable making the propene-1-olate more basic.
- Resonance/delocalization - making propene-1-olate less basic. Spreading charge lowers free energy and hence increases stability of propene-1-olate. Delocalizing the lone pair on oxygen and giving the oxygen atom less of a negative charge and makes it less available for bonding a proton for propene-1-olate
- Inductive effect - Through induction  $\text{sp}^2$  carbon groups are electron withdrawing through sigma bonds whereas  $\text{sp}^3$  carbon groups are electron donating through sigma bonds. On propene-1-olate, the next-door  $\text{sp}^2$  carbon is electron withdrawing which stabilizes the ion (by spreading the charge of the anion across a larger area). On propoxide, structure the next-door  $\text{sp}^3$  carbon is electron donating which destabilizes the anion (by concentrating negative charge on the oxygen). Therefore, propene-1-olate is less basic. Orbital - The oxygen on propene-1-olate is  $\text{sp}^2$  whereas the oxygen on propoxide is  $\text{sp}^3$ . The larger s-character on the oxygen on propene-1-olate stabilizes the negative charge on that oxygen relative to the oxygen on propoxide. Therefore, propene-1-olate is less basic.

## Codebook for Granularity

| Category   | Code                                               | Definition and criteria for inclusion                                                                                                                                                                                                                                                                                                                                                                                                                                                                                                           | Examples                                                                                                                                                                                                                                |
|------------|----------------------------------------------------|-------------------------------------------------------------------------------------------------------------------------------------------------------------------------------------------------------------------------------------------------------------------------------------------------------------------------------------------------------------------------------------------------------------------------------------------------------------------------------------------------------------------------------------------------|-----------------------------------------------------------------------------------------------------------------------------------------------------------------------------------------------------------------------------------------|
| Structural | Atom identity                                      | Participants refer to a particular atom(s) by stating the name (e.g., oxygen) and/or symbol (e.g., O, N, C, and H) of the atom(s).                                                                                                                                                                                                                                                                                                                                                                                                              | “Because oxygen is electronegative atom. And that makes the whole like, molecule become more electronegative, electronegative...” (S6)                                                                                                  |
|            | Atom count                                         | Participants refer to number of particular atom(s) by counting or stating total number.                                                                                                                                                                                                                                                                                                                                                                                                                                                         | “...there’s two oxygen atoms and one of them has an electronegative charge, there is only one oxygen here” (S1)                                                                                                                         |
|            | Functional group identity                          | Participants refer to particular functional group(s) by stating the name (e.g., aromatic ring, amine, amide, carboxyl, carbonyl, hydroxyl, six membered ring with three double bond, carbon ring, benzylic ring, the ring, phenol, phenyl etc.) or formula (e.g., -NH <sub>2</sub> , -CONH <sub>2</sub> , -C=O) of that functional group(s).                                                                                                                                                                                                    | “Um, for me, it was the presence of the carbonyl” (S8)                                                                                                                                                                                  |
|            | Bond type                                          | Participants refer to bond(s) by stating type of bond (e.g., sigma bond/single bond, pi bond/double bond/alkene, single bond has sp <sup>3</sup> , double bond has sp <sup>2</sup> ).                                                                                                                                                                                                                                                                                                                                                           | “the only difference is the double bond, so I’d assume the bond would be more strength and then in other one single bond be weaker, which would be more basic.” (S4)                                                                    |
|            | Bond count                                         | Participants refer to number of particular bond(s) by counting (e.g., sigma and pi bond) or stating total number or making inference about hybridization (e.g., sp <sup>3</sup> , sp <sup>2</sup> , and sp) based on number of sigma and double bonds.                                                                                                                                                                                                                                                                                          | “acid ion it has. This is 1, 2, 1, 2, 3 bonds” (S6)                                                                                                                                                                                     |
|            | Connectivity of atoms, ions, and functional groups | Participants refer to how atoms, ions, and functional groups are connected either explicitly (e.g., atom, ions, and functional groups are next to or adjacent to or in close proximity or connected to or attached to or bonded to other atoms, ions, and functional groups, a lone pair adjacent to C+,) or implicitly (e.g., Allylic lone pair, Allylic carbocation, lone pair on the atom because the pi bond is just right there, sp <sup>2</sup> is/being closer to CH <sub>2</sub> plus, sp <sup>2</sup> but it's one extra carbon away). | “I know it makes it less stable. I'm not sure as much as to why it makes it less stable. I mostly focused on allylic, but I do know on that greater than flow chart I was talking about vinylic was like negative below primary.” (S11) |
|            | Electron count                                     | Participants refer to number of electron either explicitly by counting or implicitly (e.g., atom with complete/incomplete octet based on number of electrons, lone pairs, valance shell).                                                                                                                                                                                                                                                                                                                                                       | “And it has the amine and the amine is here with the complete octet, I think, is a very big indicator to me that it's a more it's more basic compared to that of an Acetamide.” (S1)                                                    |
|            | Charge                                             | Participants refer to partial or negative charge on the structures explicitly featured.                                                                                                                                                                                                                                                                                                                                                                                                                                                         | “Um, for that I looked at I saw in structures two and three, they both had negative charge on the oxygen, but the first one didn’t” (S8)                                                                                                |
|            | Resonance specific                                 | Participants refer to explicit features (e.g.,                                                                                                                                                                                                                                                                                                                                                                                                                                                                                                  | “the dash, the dash is showing that                                                                                                                                                                                                     |

|            |                             |                                                                                                                                                                                                                                                                                                                                                                                                                                                                                                                                                                                                                                                                                                        |                                                                                                                                                                           |
|------------|-----------------------------|--------------------------------------------------------------------------------------------------------------------------------------------------------------------------------------------------------------------------------------------------------------------------------------------------------------------------------------------------------------------------------------------------------------------------------------------------------------------------------------------------------------------------------------------------------------------------------------------------------------------------------------------------------------------------------------------------------|---------------------------------------------------------------------------------------------------------------------------------------------------------------------------|
|            | representational feature    | double headed arrow, dashed/dotted lines, delta) of structures peculiar to resonance.                                                                                                                                                                                                                                                                                                                                                                                                                                                                                                                                                                                                                  | the bonds can be formed or broken? And it's basically simultaneous" (S9)                                                                                                  |
| Electronic | Electron withdrawal         | Participants refer to electron withdrawal by describing this using various verbs and nouns (e.g., atom withdraws electrons, pull of electrons, pull on the atom, electron withdrawing).                                                                                                                                                                                                                                                                                                                                                                                                                                                                                                                | "Yeah. the pull on the on the carbon would be greater than that on the one with the one oxygen and the carbon" (S3)                                                       |
|            | Bearing charge              | Participants refer to the capacity of bearing charge (e.g., charge is strongly attached to more electronegative atom and atom can hold negative charge better than the other atom).                                                                                                                                                                                                                                                                                                                                                                                                                                                                                                                    | "Carbon is I mean, they can hold negative charges, but they don't hold them as well as oxygen to. So that's why I would go to Blue hydrogen" (S7)                         |
|            | Spreading charge            | Participants refers to spreading of charge either by explicitly stating how charge is spread (e.g., convert negative charge to a neutral charge, balance out negative charge, neutralize negative charge, charge can be evenly distributed, pull negative charge, resonate charges that can jump around, charge can not really move from the atom over, positive charge would leave that atom then positive charge would be on that atom) and/or the use of a drawing indicating charge separation from formal negative charge on one atom to partial negatives on multiple atoms.                                                                                                                     | "Oh, and no, I was just saying that the resonance allows it to move the negative charge around and be, and stabilize while the ethoxide, it can't perform resonance" (S2) |
|            | Delocalization of electrons | Participants refer to delocalization of electrons by explicitly stating how electrons are delocalized (e.g., electrons to move around, pi/double bond/s can move, pi bonds can move interchangeably, pi bond can move over here/there and that/this one can move over here/there or that/this one can move up/down, move lone pairs down/up/here/there, change where the electrons are, electrons can shift, delocalization/delocalized electrons, free movement of electrons, do resonance, resonate down, resonance can keep going, how much room the electron could take up and the different positions that it could exist in) and/or the use of a drawing indicating delocalization of electrons. | "Like the double bond could go up to the O and that this could make a pi bond which would then make the nitrogen positive and then that wants to accept" (S12).           |



## Granularity Analysis- Stability

| Interviewee | Granularity | Coding for Stability 1                                                               | Coding for Stability 2                             |
|-------------|-------------|--------------------------------------------------------------------------------------|----------------------------------------------------|
| S1          | Structural  | Atom identity<br>Connectivity                                                        | Connectivity                                       |
|             | Electronic  | Delocalization of electrons<br>Spreading charge                                      |                                                    |
| S2          | Structural  | Functional group identity                                                            | Connectivity                                       |
|             | Electronic  | Delocalization of electrons<br>Spreading charge                                      |                                                    |
| S3          | Structural  | Atom identity<br>Connectivity<br>Charge                                              | Atom count<br>Bond count<br>Connectivity           |
|             | Electronic  | Delocalization of electrons                                                          | Spreading of charge<br>Delocalization of electron  |
| S4          | Structural  | Bond type<br>Charge                                                                  | Atom count<br>Bond count<br>Connectivity           |
|             | Electronic  |                                                                                      |                                                    |
| S5          | Structural  | Atom identity<br>Bond type                                                           | Bond type<br>Bond count                            |
|             | Electronic  |                                                                                      |                                                    |
| S6          | Structural  | Atom identity<br>Atom count<br>Functional group identity<br>Electron count<br>Charge | Connectivity<br>Electron count<br>Charge           |
|             | Electronic  | Delocalization of electron                                                           | Spreading of charge<br>Delocalization of electron  |
| S7          | Structural  | Connectivity<br>Functional group identity<br>Charge                                  | Connectivity<br>Electron count<br>Charge           |
|             | Electronic  | Spreading of charge<br>Delocalization of electron<br>Electron withdrawal             | Delocalization of electron                         |
| S8          | Structural  | Atom count<br>Functional group identity<br>Charge                                    | Connectivity                                       |
|             | Electronic  | Spreading of charge<br>Delocalization of electron                                    | Spreading of charge<br>Delocalization of electron  |
| S9          | Structural  | Bond type                                                                            | Connectivity                                       |
|             | Electronic  |                                                                                      |                                                    |
| S10         | Structural  | Connectivity<br>Functional group identity<br>Bond count                              | Connectivity                                       |
|             | Electronic  | Delocalization of electron                                                           | Spreading of charge<br>Delocalization of electrons |
| S11         | Structural  | Bond count<br>Atom count                                                             | Connectivity                                       |
|             | Electronic  | Spreading of charge<br>Delocalization of electron                                    |                                                    |
| S12         | Structural  | Bond type<br>Atom identity<br>Atom count                                             | Bond type<br>Connectivity                          |
|             | Electronic  |                                                                                      | Delocalization of electrons                        |
| S13         | Structural  | Connectivity                                                                         | Atom identity<br>Bond count                        |

|     |            |                                                   |                                                   |
|-----|------------|---------------------------------------------------|---------------------------------------------------|
|     |            |                                                   | Connectivity                                      |
|     | Electronic | Spreading of charge<br>Delocalization of electron | Spreading of charge<br>Delocalization of electron |
| S14 | Structural | Bond type<br>Electron count<br>Charge             | Charge                                            |
|     | Electronic | Spreading of charge<br>Delocalization of electron | Spreading of charge<br>Delocalization of electron |

## Granularity Analysis- Acidity

| Interviewee | Granularity | Coding for Acidity 1                                                                                         | Coding for Acidity 2                                                                             |
|-------------|-------------|--------------------------------------------------------------------------------------------------------------|--------------------------------------------------------------------------------------------------|
| S1          | Structural  | Atom identity<br>Atom count<br>Bond type<br>Charge<br>Resonance specific representational feature            | Atom identity<br>Connectivity of atoms, ions, and functional groups                              |
|             | Electronic  | Delocalization of electrons<br>Spreading charge                                                              | Electron withdrawal                                                                              |
| S2          | Structural  | Atom identity<br>Charge<br>Resonance specific representational feature                                       | Connectivity of atoms, ions, and functional groups                                               |
|             | Electronic  | Delocalization of electrons<br>Spreading charge                                                              | Delocalization of electrons<br>Spreading charge                                                  |
| S3          | Structural  | Atom identity<br>Atom count<br>Charge<br>Resonance specific representational feature                         | Atom identity<br>Connectivity of atoms, ions, and functional groups                              |
|             | Electronic  | Delocalization of electrons<br>Spreading of charge<br>Electron withdrawal                                    | Delocalization of electrons<br>Electron withdrawal                                               |
| S4          | Structural  | Bond type<br>Bond count<br>Charge<br>Electron count<br>Functional group identity                             | Atom count<br>Bond type<br>Connectivity of atoms, ions, and functional groups                    |
|             | Electronic  |                                                                                                              |                                                                                                  |
| S5          | Structural  | Resonance specific representational feature                                                                  | Atom identity<br>Connectivity of atoms, ions, and functional groups                              |
|             | Electronic  | Delocalization of electrons                                                                                  | Electron withdrawal                                                                              |
| S6          | Structural  | Atom identity<br>Atom count<br>Bond count<br>Bond type<br>Connectivity of atoms, ions, and functional groups | Atom identity<br>Connectivity of atoms, ions, and functional groups<br>Electron count            |
|             | Electronic  | Electron withdrawal<br>Polarization                                                                          | Delocalization of electrons                                                                      |
| S7          | Structural  | Functional group identity<br>Resonance specific representational feature                                     | Connectivity of atoms, ions, and functional groups<br>Atom identity<br>Functional group identity |
|             | Electronic  | Delocalization of electrons                                                                                  | Bearing charge<br>Delocalization of electrons<br>Spreading charge                                |
| S8          | Structural  | Atom identity<br>Charge<br>Resonance specific representational feature                                       | Functional group identity                                                                        |
|             | Electronic  | Delocalization of electrons<br>Spreading charge                                                              | Delocalization of electrons<br>Spreading charge                                                  |
| S9          | Structural  | Atom identity<br>Atom count<br>Charge                                                                        | Atom identity<br>Connectivity of atoms, ions, and functional groups                              |
|             | Electronic  |                                                                                                              |                                                                                                  |
| S10         | Structural  | Atom identity                                                                                                | Connectivity of atoms, ions, and functional                                                      |

|     |            |                                                       |                                                    |
|-----|------------|-------------------------------------------------------|----------------------------------------------------|
|     |            | Charge<br>Resonance specific representational feature | groups                                             |
|     | Electronic | Delocalization of electrons                           | Delocalization of electrons                        |
| S11 | Structural | Charge<br>Resonance specific representational feature | Connectivity of atoms, ions, and functional groups |
|     | Electronic | Delocalization of electrons                           | Delocalization of electrons                        |
| S12 | Structural | Atom identity<br>Atom count<br>Charge                 | Connectivity of atoms, ions, and functional groups |
|     | Electronic |                                                       | Delocalization of electrons<br>Electron withdrawal |
| S13 | Structural | Charge<br>Resonance specific representational feature | Connectivity of atoms, ions, and functional groups |
|     | Electronic | Delocalization of electrons<br>Spreading charge       | Delocalization of electrons                        |
| S14 | Structural | Charge<br>Resonance specific representational feature | Connectivity of atoms, ions, and functional groups |
|     | Electronic | Delocalization of electrons<br>Spreading charge       | Delocalization of electrons                        |

## Granularity Analysis- Basicity

| Interviewee | Granularity | Coding for Basicity 1                                                                                 | Coding for Basicity 2                                                     |
|-------------|-------------|-------------------------------------------------------------------------------------------------------|---------------------------------------------------------------------------|
| S1          | Structural  | Charge<br>Electron count<br>Functional group identity                                                 | Bond type                                                                 |
|             | Electronic  |                                                                                                       | Delocalization of electrons                                               |
| S2          | Structural  | Atom identity<br>Charge<br>Electron count                                                             | Connectivity of atoms, ions, and functional groups                        |
|             | Electronic  |                                                                                                       | Delocalization of electrons<br>Spreading charge                           |
| S3          | Structural  | Atom identity<br>Charge<br>Electron count<br>Resonance specific representational feature              | Connectivity of atoms, ions, and functional groups                        |
|             | Electronic  | Delocalization of electrons<br>Polarization                                                           | Delocalization of electrons                                               |
| S4          | Structural  | Atom identity<br>Bond type<br>Bond count<br>Charge<br>Functional group identity                       | Atom identity<br>Atom count<br>Bond type<br>Charge                        |
|             | Electronic  |                                                                                                       |                                                                           |
| S5          | Structural  | Charge<br>Electron count<br>Functional group identity                                                 | Bond type                                                                 |
|             | Electronic  |                                                                                                       |                                                                           |
| S6          | Structural  | Atom identity<br>Atom count<br>Electron count<br>Functional group identity                            | Atom count<br>Electron count                                              |
|             | Electronic  |                                                                                                       | Delocalization of electrons<br>Spreading charge                           |
| S7          | Structural  | Atom identity<br>Charge<br>Resonance specific representational feature                                | Bond type<br>Charge<br>Connectivity of atoms, ions, and functional groups |
|             | Electronic  |                                                                                                       | Delocalization of electrons<br>Spreading charge                           |
| S8          | Structural  | Atom identity<br>Charge<br>Electron count<br>Resonance specific representational feature              | Bond type                                                                 |
|             | Electronic  | Delocalization of electrons<br>Spreading charge                                                       | Delocalization of electrons                                               |
| S9          | Structural  | Atom identity<br>Bond type<br>Charge<br>Electron count<br>Resonance specific representational feature | Connectivity of atoms, ions, and functional groups                        |
|             | Electronic  | Delocalization of electrons                                                                           |                                                                           |
| S10         | Structural  | Charge<br>Resonance specific representational feature                                                 | Bond type                                                                 |
|             | Electronic  | Delocalization of electrons                                                                           |                                                                           |

|     |            |                                                          |                                                    |
|-----|------------|----------------------------------------------------------|----------------------------------------------------|
|     |            | Spreading charge<br>Electron withdrawal                  |                                                    |
| S11 | Structural | Atom identity<br>Charge<br>Electron count                | Bond count<br>Charge<br>Electron count             |
|     | Electronic | Delocalization of electrons<br>Spreading charge          | Delocalization of electrons                        |
| S12 | Structural | Bond type<br>Resonance specific representational feature | Connectivity of atoms, ions, and functional groups |
|     | Electronic | Delocalization of electrons<br>Spreading charge          | Delocalization of electrons                        |
| S13 | Structural | Atom identity                                            | Bond type                                          |
|     | Electronic | Bearing charge<br>Delocalization of electrons            | Delocalization of electrons                        |
| S14 | Structural | Charge<br>Functional group identity<br>Electron count    | Bond type                                          |
|     | Electronic |                                                          |                                                    |
